# Supplementary material for: Designed active-site library reveals thousands of functional GFP variants
Source: PubMed Central journal article supplement (PMC10199939; doi:10.1038/s41467-023-38099-z), 2023-05-20
Supplement: 41467_2023_38099_MOESM3_ESM.pdf [file 41467_2023_38099_MOESM3_ESM.pdf]

## **Description of Additional Supplementary Files:**

**Supplementary Dataset 1.** nohbonds library neighborhoods.

**Supplementary Dataset 2.** hbonds library neighborhoods.

**Supplementary Dataset 3.** Amino acids after filtration and EpiNNet enrichment for the nohbonds library.

A) each position has, at a minimum, a single amino acid, the PROSS-eGFP identity at that position.

B) position 65 is part of the chromophore and was mutated to Ser without being modelled in the Rosetta calculations.

**Supplementary Dataset 4.** Amino acids after filtration and EpiNNet enrichment for the hbonds library.

A) each position has, at a minimum, a single amino acid, the PROSS-eGFP identity at that position.

B) position 65 is part of the chromophore and was mutated to Ser without being modelled in the Rosetta calculations.

**Supplementary Dataset 5.** Sequence spaces of the two libraries.

**Supplementary Dataset 6.** Mutations occurring functional sequences from both libraries.

**Supplementary Dataset 7.** Biophysical characterization of the individually tested designs.

Source data are provided as a Source Data file.

**Supplementary Dataset 8.** DNA oligos required to clone the libraries
